# Supplementary material
Source: HighWire-hosted journal article supplement (https://bmjopen.bmj.com/content/15/2/e090696)
Supplement: inline-supplementary-material-2 [file inline-supplementary-material-2.pdf]

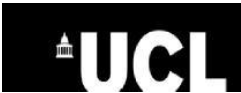

[Print on Hospital Headed paper]

PARENT/LEGAL GUARDIAN CONSENT FORM

**Title:** A Multi-site randomised controlled trial assessing the effectiveness of the Little Journey app at reducing peri-operative anxiety compared to standard care

**R&D / Sponsor Reference Number:** 18/0197

**Protocol version number and date:** \_\_\_\_\_

STAGE ONE: TO BE COMPLETED AT TIME OF TELEPHONE CONSENT

|                      |  |
|----------------------|--|
| Subject Number:      |  |
| Name of Parent/Carer |  |

Person Obtaining Consent

I have read this form to the subject. An explanation of the research was given and questions from the subject were solicited and answered to the subject’s satisfaction. In my judgment, the subject has demonstrated comprehension of the information. The subject has provided oral consent to participate in this study.

|                                              |  |       |  |
|----------------------------------------------|--|-------|--|
| Name of Researcher obtaining remote consent: |  |       |  |
| Date:                                        |  | Time: |  |

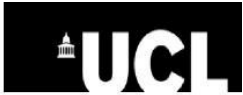

PARENT/LEGAL GUARDIAN CONSENT FORM

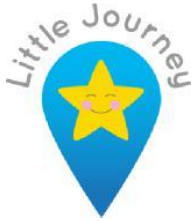

Title: A Multi-site randomised controlled trial assessing the effectiveness of the Little Journey app at reducing peri-operative anxiety compared to standard care

R&D / Sponsor Reference Number: 18/0197

Protocol version number and date: \_\_\_\_\_

STAGE TWO: TO BE COMPLETED ON THE DAY OF SURGERY FOLLOWING ARRIVAL AT HOSPITAL

Please initial all boxes

1. I confirm that I have read the information sheet dated \_\_\_\_\_ (version \_\_\_\_\_) for the above study. I have had the opportunity to consider the information, ask questions and have had these answered satisfactorily.

☐
2. I understand that our participation is voluntary and that I am free to withdraw at any time without giving any reason, without my medical care or legal rights being affected.

☐
3. I understand that relevant sections of my child’s medical notes and data collected during the study, may be looked at by individuals from regulatory authorities or from the NHS Trust, where it is relevant to my taking part in this research. I give permission for these individuals to have access to the records.

☐
4. I understand that the information collected about my child will be used to support other research in the future and may be shared anonymously with other researchers.

☐
5. I confirm that the Surgical & Interventional Trials Unit can hold my details and contact me after one-year for an update on my child’s recovery after surgery.

☐
6. I agree for my child and I to take part in the above study.

☐

|                                           |               |                    |
|-------------------------------------------|---------------|--------------------|
| _____<br>Name of Participant              | _____<br>Date | _____<br>Signature |
| _____<br>Name of Person<br>taking consent | _____<br>Date | _____<br>Signature |
